# Supplementary material for: Observation of transition cascades in sheared liquid crystalline polymers
Source: Royal Society of Chemistry journal article supplement (doi:10.1039/d0sm00275e), 2020-01-01
Supplement: d0sm00275e1.pdf [file d0sm00275e1.pdf]

## Supporting Information

# Observation of Transition Cascades in Sheared Liquid Crystalline Polymers

*Ryan J. Fox<sup>1</sup>, M. Gregory Forest<sup>1,2</sup>, Stephen J. Picken<sup>3</sup>, and Theo J. Dingemans<sup>1\*</sup>*

<sup>1</sup>Department of Applied Physical Sciences, University of North Carolina at Chapel Hill, Chapel Hill, NC 27599-3050, United States

<sup>2</sup>Department of Mathematics, University of North Carolina at Chapel Hill, Chapel Hill, NC 27599-3250, United States

<sup>3</sup>Faculty of Applied Sciences, Delft University of Technology, Van der Maasweg 9, 2629 HZ Delft, The Netherlands

### AUTHOR INFORMATION

#### **Corresponding Author**

\*E-mail: [tjd@unc.edu](mailto:tjd@unc.edu)

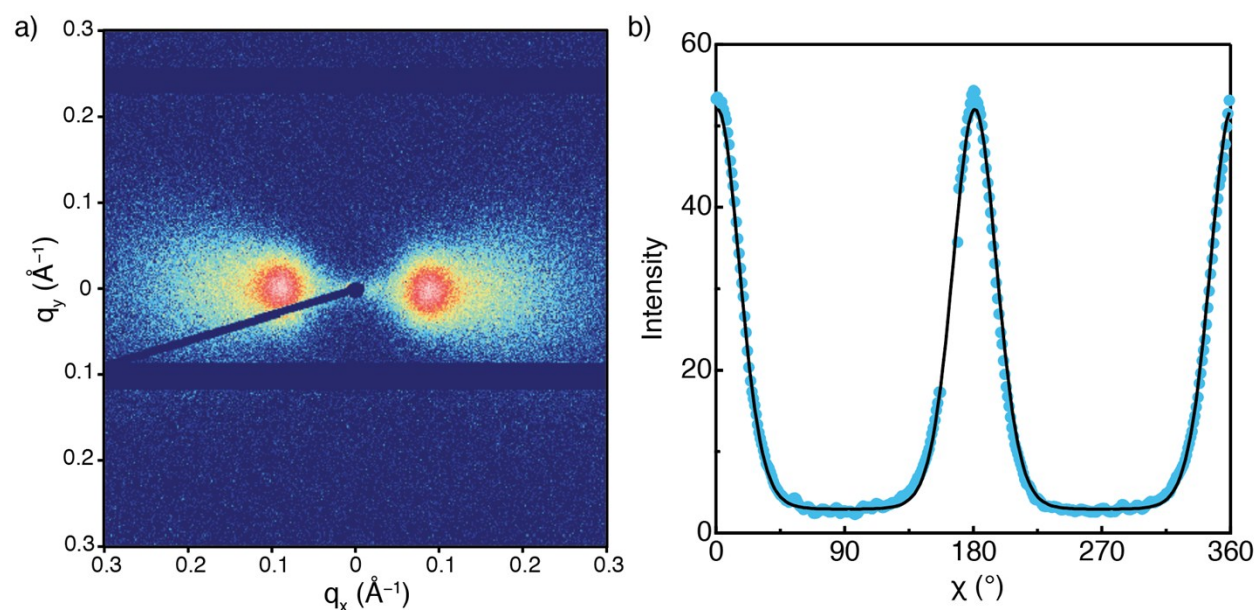

**Figure S1.** (a) 2D SAXS pattern of an aligned 2.8 wt.% PBDT solution and (b) 1D azimuthal intensity integrated over the  $q$ -range between  $q = 0.05 - 0.13 \text{ \AA}^{-1}$  and fit with the Maier-Saupe orientation distribution function.<sup>1</sup> The monodomain was prepared by alignment within a magnetic field, and after removal from the field, the monodomain alignment remained due to confinement within the narrow, cylindrical capillary.<sup>2</sup> The calculated order parameter is  $S_{eq} = 0.886 \pm 0.002$ .

## REFERENCES

1. S. J. Picken, J. Aerts, R. Visser and M. G. Northolt, *Macromolecules*, 1990, **23**, 3849-3854.
2. Y. Wang, J. Gao, T. J. Dingemans and L. A. Madsen, *Macromolecules*, 2014, **47**, 2984-2992.
